# Supplementary material
Source: publisher figshare collection journal article supplement (https://future-science-group.figshare.com/ndownloader/files/29039838)
Supplement: Supplementary file 1 [file 29039838]

Supplementary materials

**Supplementary Figure S1:**


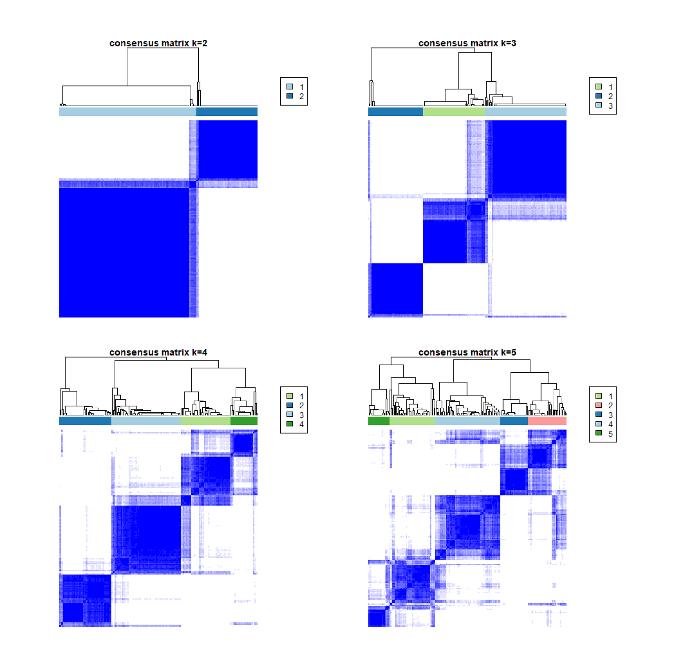


Figure S1 consensus matrixes of ICI clusters in all PC sample for each (k=2-5)

**Supplementary Figure S2:**


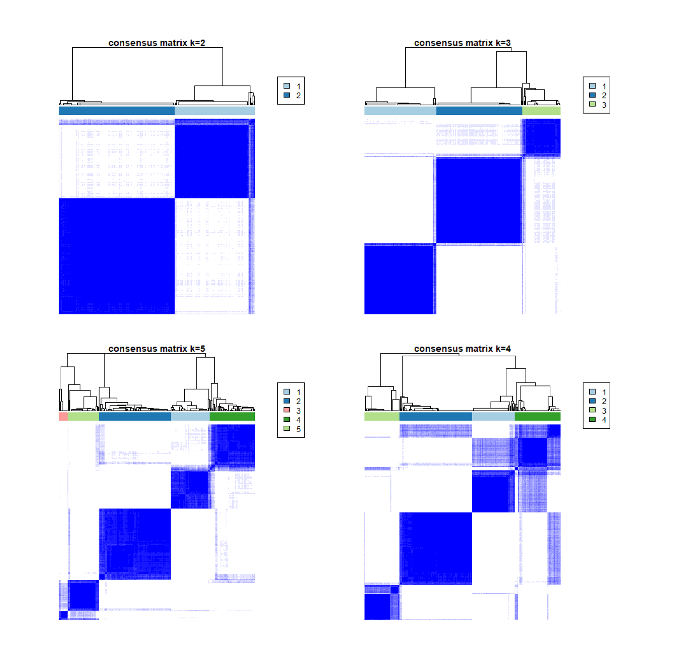


Figure S2 consensus matrixes of gene clusters in all PC sample for each (k=2-5)
